# Supplementary material
Source: publisher figshare collection journal article supplement (https://acs.figshare.com/ndownloader/files/5823336)
Supplement: Supplementary file 1 [file 5823336]

## Influence of the Interplay of Crystallization and Chain Stretching on Micellar Morphologies: Solution Self-Assembly of Coil-Crystalline Poly(isoprene-*block*-ferrocenylsilane)

Lan Cao, Ian Manners,\* and Mitchell A. Winnik\*

*Department of Chemistry, University of Toronto, 80 St. George Street, Toronto, Ontario,*

*Canada M5S 3H6*

### Supporting Information:

Molecular weights of the polymers were estimated by size exclusion chromatography (SEC) using Waters Associates 2690 Separations Module equipped with a column heater, ultrastyrigel columns with pore sizes of  $10^3$ - $10^5$  Å, in-line degasser, and a differential refractometer. A flow rate of 1.0 mL/min was used, and the eluent was THF. Polystyrene standards purchased from American Polymer Standards were used for calibration purposes. The 200 MHz  $^1\text{H}$  NMR spectra were recorded on a Varian Gemini 200 spectrometer with deuterated chloroform as the solvent. Transmission electron microscopy (TEM) measurements were carried out on a Hitachi model 600 electron microscope. The specimen was prepared as follows. Thin carbon films were grown on mica as a support. Then 25  $\mu\text{L}$  of a block copolymer micelle solution was sprayed onto the carbon film. Each carbon film was floated off the mica support in water and deposited onto a 300 mesh Gilder copper grid. The sample was air-dried before introduction into the electron microscope.
